1 **Dynamics of methane cycling microbiome during methane flux hot moments from**  
2 **riparian buffer systems**

3 Dasiel Obregon<sup>1,2, §</sup>, Tolulope Mafa-Attoye<sup>1, §</sup>, Megan Baskerville<sup>3</sup>, Eduardo Mitter<sup>1</sup>, Leandro Fonseca  
4 de Souza<sup>2</sup>, Maren Oelbermann<sup>4</sup>, Naresh Thevathasan<sup>1</sup>, Siu Mui Tsai<sup>2</sup>, Kari Dunfield<sup>1,\*</sup>

5 <sup>1</sup>School of Environmental Science, University of Guelph, 50 Stone Rd E, Guelph, ON, N1H 2W1,  
6 Canada

7 <sup>2</sup>Center for Nuclear Energy in Agriculture, University of São Paulo, Av. Centenário, 303 - São Dimas,  
8 Piracicaba, SP, 13400-970, Brazil

9 <sup>3</sup>Environment and Climate Change Canada, 351, Boul. Saint-Joseph, Gatineau, Quebec, QC, K1A  
10 OH3, Canada

11 <sup>4</sup>School of Environment, Resources, and Sustainability, University of Waterloo, 200 University  
12 Avenue West, Waterloo, ON, N2L 3G1 Canada

13 <sup>§</sup> These authors contributed equally to this work.

14 **\*Corresponding author at:** Applied Soil Ecology Lab, School of Environmental Science,  
15 University of Guelph, 50 Stone Road East, Guelph, ON, N1G 2W1, Canada. *E-mail address:*  
16 [dunfield@uoguelph.ca](mailto:dunfield@uoguelph.ca) (K. Dunfield)

17

18

19

## 20 **Abstract**

21 Riparian buffer systems (RBS) are a common agroforestry practice that consists of keeping a forested  
22 boundary adjacent to water bodies in agricultural landscapes, thus helping to protect aquatic  
23 ecosystems from adverse impacts. Nevertheless, despite the multiple benefits they provide, RBSs can  
24 be hotspots of methane emissions since abundant organic carbon and high-water tables are often found  
25 in these soils. In southern Ontario, Canada, the rehabilitation of Washington Creek's streambank  
26 occurred in 1985. In a recent study, methane (CH<sub>4</sub>) fluxes were measured biweekly for two years  
27 (2017-2018) in four different vegetative riparian areas alongside Washington creek: a rehabilitated tree  
28 buffer (RH), a grassed buffer (GRB), an undisturbed deciduous forest (UNF), an undisturbed  
29 coniferous forest (CF), and an adjacent agricultural field (AGR) for comparison. Based on methane  
30 fluxes in 2018 and hot moments identified, we selected two dates from summer (July 04 and August  
31 15) and use soil sampling from those days to assess the CH<sub>4</sub> cycling microbial communities in these  
32 RBS. We used qPCR and high-throughput sequencing from both DNA and cDNA to measure the  
33 diversity and activity of the methanogen and methanotroph communities. Methanogens were abundant  
34 in all riparian soils, including the archaeal genera *Methanosaeta*, *Methanosarcina*,  
35 *Methanomassiliicoccus* *Methanoregula*, but they were mostly active in UNF soils. Among  
36 methanotrophs, *Methylocystis* was the most abundant taxon in all the riparian sites, except for AGR  
37 soils where the methanotrophs community mostly comprised members of rice paddy clusters (RPCs  
38 and RPC-1) and upland soil clusters (TUSC and USC $\alpha$ ). In summary, these results indicate that  
39 differences in CH<sub>4</sub> fluxes between RBS at Washington creek are influenced by differences in the  
40 presence and activity of methanogens, which were higher in the deciduous forest (UNF) soils during  
41 hot moments CH<sub>4</sub> flux, likely due to high water content in that soils.

42 **Keywords:** Agroforestry, vegetative riparian buffer, CH<sub>4</sub> fluxes, methanogens, methanotrophs,  
43 diversity

## 44 **1 Introduction**

45 Riparian buffers are the transitional boundary between terrestrial and aquatic ecosystems, usually  
46 forested, that help to protect the stream from the impact of adjacent land uses (NRCS, 2003).  
47 Freshwater ecosystems (e.g., streams, creeks and rivers) are among the most affected by the loss of  
48 riparian vegetation due to land-use change and agricultural intensification (Fortier et al., 2010;  
49 Meneses et al., 2015; Ye et al., 2014). The establishment of riparian buffer systems (RBS) has become  
50 a widely used strategy for protecting water bodies, with predominantly planted trees and shrubs along  
51 agriculturally degraded streams (AAFC, 2021; Guidotti et al., 2020; NRCS, 2011). Among other  
52 ecological services, RBS protects aquatic habitats by providing shade and maintaining water  
53 temperatures, providing detritus and woody debris for the soil biota, and trapping water runoff of  
54 pesticides, sediments, and fertilizers from adjacent areas (Bourgeois et al., 2016; Fortier et al., 2010;  
55 Lovell and Sullivan, 2006).

56 Due to their role in retaining nutrients, RBS are fundamental to biogeochemical cycles within  
57 the landscape (Fortier et al., 2010). It is believed that RBS can contribute to mitigating GHG emissions  
58 through large amounts of carbon (C) sequestration via plant and soil biomass (Audet et al., 2013;  
59 Capon et al., 2013). Yet, RBS can also be a source of GHG emissions through microbially mediated  
60 processes of C mineralization and methanogenesis (Vidon et al., 2016), whereas these processes are  
61 enhanced by favorable soil conditions in RBS (e.g., high levels of soil organic C (SOC) and high  
62 water tables are conducive to increasing CH<sub>4</sub> emissions) (Audet et al., 2013; Bradley et al., 2011;  
63 Vidon et al., 2019). Accordingly, some studies had found that RBSs are responsible for a high  
64 proportion of CH<sub>4</sub> release in agricultural landscapes (Dinsmore et al., 2009b; Jacinthe et al., 2015;

65 Vidon et al., 2015, 2014). The CH<sub>4</sub> fluxes in the RBS are also affected by the type of vegetation  
66 present, with contrasting results about what vegetation type (e.g., herbaceous or treed RBS) better  
67 contribute to reduce CH<sub>4</sub> emission (Dutaur and Verchot, 2007; Kim et al., 2010a). Therefore, it is  
68 important to determine the contribution of RBS to CH<sub>4</sub> cycles to evaluate the trade-offs between  
69 economic and environmental benefits (Sonesson et al., 2020; Vidon et al., 2015, 2019).

70 Methane cycling in soils is driven by anaerobic methanogens (archaea), and aerobic  
71 methanotrophs, which are mostly methane oxidizing bacteria (MOB) (Knief, 2015; Malyan et al.,  
72 2016). Several soil factors, such as moisture, temperature, pH, organic matter (OM) content, and  
73 nutrient availability (i.e., C, N, Cu, Fe), are known to affect CH<sub>4</sub> synthesis and oxidation (Serrano-  
74 Silva et al., 2014; Tate, 2015). Since groundwater level is a key driver of O<sub>2</sub> diffusion, both  
75 methanogenesis (anaerobic) and methanotrophy (aerobic) are distinctly affected by soil water content  
76 (Malyan et al., 2016; Matson et al., 2017; Serrano-Silva et al., 2014). Consequently, several studies  
77 have reported negative correlations between water table depth and CH<sub>4</sub> fluxes in RBS (Dinsmore et  
78 al., 2009a; Jacinthe et al., 2015). Yet, only a few studies have addressed the methanogens and  
79 methanotrophs communities in the context of riparian buffers (Kim et al., 2008; Krause et al., 2013).

80 Temperate riparian buffers are characterized by temperature variability and seasonal water table,  
81 in which their interaction are key drivers of CH<sub>4</sub> flux (Jacinthe et al., 2015; Kaiser et al., 2018; Mander  
82 et al., 2015; Vidon et al., 2015). For instance, in RBS in the United States Midwest, Vidon et al.  
83 (2014) reported strong CH<sub>4</sub> emissions after intense summer flooding events. These results were also  
84 confirmed by Jacinthe et al. (2015), who detected high CH<sub>4</sub> emission rates after rewetting events in the  
85 summer (>22°C), but not after spring floods, likely due to low (<11°C) soil temperatures. Therefore, it  
86 is expected that spatial ('hot spots') and temporal ('hot moments') variability in CH<sub>4</sub> fluxes occur  
87 between RBS in response to changes in edaphic factors (e.g., pH, C, SBD), but also changes in

88 environmental conditions, either seasonally or throughout a weather event (Jacinthe et al., 2015; Vidon  
89 et al., 2015, 2014).

90 In Canada, one of the first experimental studies of riparian rehabilitation was established in 1985  
91 adjacent to an agriculturally degraded stream (Washington Creek) in southern Ontario (Oelbermann  
92 and Gordon, 2000). Beneficial impacts of the RBS on both local terrestrial and aquatic environments  
93 were observed since rehabilitation was initiated, e.g., reduced soil respiration, enhanced wildlife  
94 habitat and maintenance of stream water temperature (Oelbermann et al., 2008). Concerning  
95 greenhouse gases, De Carlo et al. (2019) found no significant differences in N<sub>2</sub>O emissions between  
96 the rehabilitated and an upstream natural riparian forests, which was confirmed later by Baskerville et  
97 al. (2021), who also found lower N<sub>2</sub>O emissions in the RBS compared to an agricultural field adjacent  
98 to the rehabilitated RBS. Moreover, Mafa-Attoye et al. (2020) detected significant differences in N-  
99 cycling bacterial communities between RBS and agricultural soils. Recently, a study conducted by  
100 Baskerville et al. (2021) quantified the seasonal variation of CO<sub>2</sub> and CH<sub>4</sub> fluxes for two years (2017  
101 and 2018) along Washington Creek. Specifically, they performed biweekly gas measurements and  
102 detected differences in CH<sub>4</sub> fluxes among RBSs as well as seasonal variability within them, based on  
103 different types of vegetation.

104 For further understanding of the biogeochemical CH<sub>4</sub> cycle in this context, and specifically the  
105 activity of the microbial communities driving the CH<sub>4</sub> production and consumption, we identified hot  
106 moments of CH<sub>4</sub> emission (representing CH<sub>4</sub> flux peaks in the framework of this study) in the seasonal  
107 measurements in 2018 from Baskerville et al. (2021). Using the soil that was concurrently sampled  
108 during gas collection by Baskerville et al. (2021) we set out to characterize the methanogen and  
109 methanotroph communities in terms of abundance, taxonomic diversity, and activity. We hypothesize  
110 that different CH<sub>4</sub>-cycling taxa are ubiquitous in the different RBS soils and are driven by different

111 edaphic factors and stimulated by environmental conditions (i.e., seasonal rainfall and temperature).  
112 This study aimed to *i*) evaluate methanogen and methanotroph abundance and community composition  
113 between RBS, and compare it to an adjacent agricultural field, *ii*) determine the taxonomic profile of  
114 active taxa during hot moments of CH<sub>4</sub> flux, and *iii*) identify abiotic drivers of CH<sub>4</sub>-cycling  
115 communities.

## 116 **2 Material and Methods**

### 117 **2.1 Study site**

118 This study was conducted at Washington Creek, located in the Township of Blandford-Blenheim,  
119 Oxford County, Ontario, Canada. Washington Creek is a 9-km long 1st-order spring-fed stream within  
120 the Grand River watershed that flows into the Nith River south of Plattsville (43°18'N 80°33'W)  
121 (Figure 1). The landscape in Oxford County is dominated by agricultural fields with very little  
122 streambank vegetation, causing a high degree of streambank and aquatic habitat degradation. The  
123 climate is temperate, with a mean annual temperature of 7.3°C, mean annual precipitation is 919 mm  
124 (Supplementary Figure S1), and a mean annual frost-free period of 208 days (Environment Canada,  
125 2020). The soil in Oxford County is classified as a Grey Brown Luvisol that has an overall loamy  
126 texture with hilly areas consisting of silt loam and sand, Plattsville is located 304 m above sea level  
127 (Mozuraitis and Hagarty, 1996). The agricultural landscape along Washington Creek is dominated by  
128 row cropping of corn (*Zea mays L.*) in rotation with soybeans (*Glycine max (L.)*), or pastureland on  
129 both sides of the stream. For this study, four RBS with different vegetation types were sampled along  
130 Washington Creek: an undisturbed natural deciduous forest (UNF), a natural coniferous forest (CF), a  
131 grassed riparian buffer (GRB), a 33-year-old rehabilitated forest buffer (RH), and an agricultural  
132 (AGR) field on soybeans rotation (Figure 1).



133

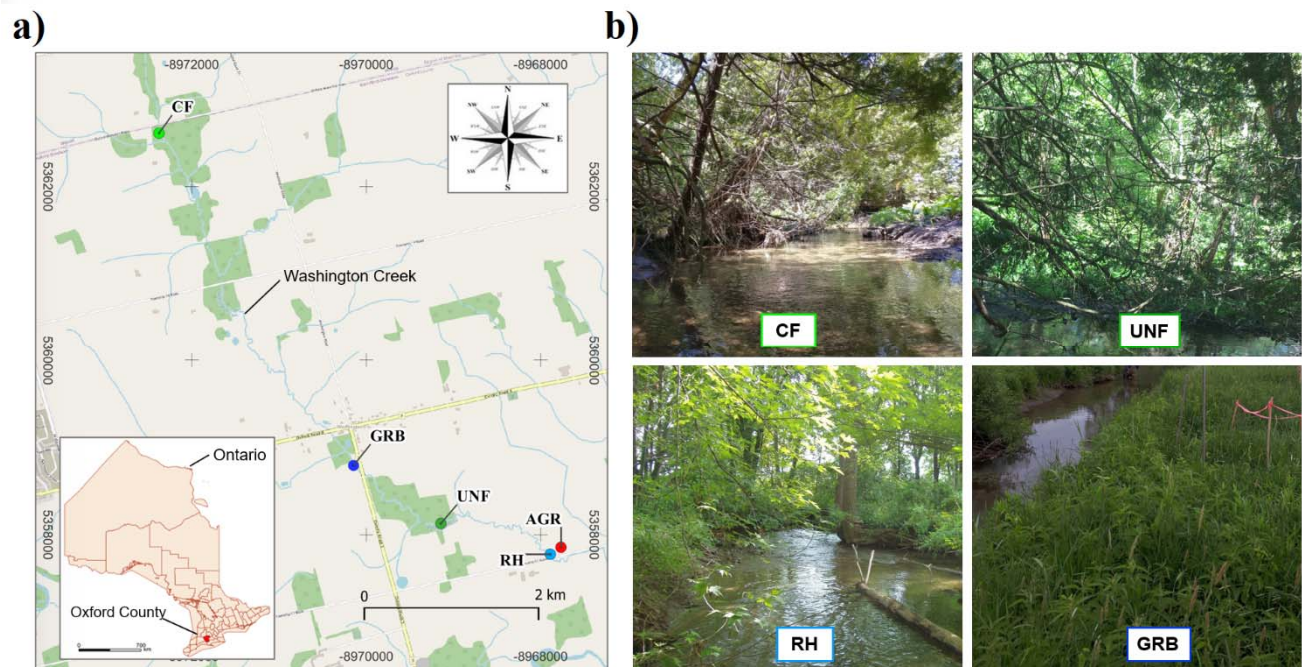

134  
135 **Figure 1.** Sampling area. **a)** Aerial view of the Washington Creek region, located in the Township of  
136 Blandford-Blenheim, Oxford County, Ontario, Canada. Diverse RBS occur along the same  
137 agriculturally degraded stream. Four sites from different RBS were studied, which occur on both sides  
138 of the stream and are situated within a 5-km stretch of Washington Creek. The geographic location of  
139 each site is shown: CF- undisturbed coniferous forest, UNF- undisturbed deciduous forest, GRB-  
140 grassed buffer, RH-rehabilitated forest buffer, and AGR-agricultural land. **b)** A picture from each one  
141 of the RBS is shown, except for the AGR soil which consisted of a conventional soybean field.

142  
143 Detailed information about the vegetation in each RBS site was provided by Baskerville et al.  
144 (2021). Briefly, the UNF RBS predominantly consisted of American beech (*Fagus grandifolia* E.),  
145 sugar maple (*Acer saccharum* L.), basswood (*Tilia americana* L.), and eastern hemlock (*Tsuga*  
146 *canadensis*) that has remained undisturbed for ~150 years. The CF RBS occurs at the source of  
147 Washington Creek, and is composed of Eastern White Cedar (*Thuja occidentalis*). This RBS has been  
148 undisturbed for ~100 years and is characterized by a high amount of deadwood with little understory  
149 vegetation. The RH RBS consisted of perennial vegetation such as alder [*Alnus incana* subsp. *rugosa*

150 (Du Roi) R.T. Clausen., *Alnus glutinosa* (L.) Gaertn., and *Alnus rubra* Bong.], hybrid poplar (*Populus*  
151 *x canadensis* Moench), silver maple (*Acer saccharinum* L.), multiflora rosevine (*Rosa multiflora*  
152 Thunb.) and red osier dogwood (*Cornus sericea* subsp. *sericea* L.) (Oelbermann et al., 2008). The  
153 grass buffer (GRB) consists mainly of bentgrass (*Agrostis app.*) and purple-stemmed aster  
154 (*Symphotrichum puniceum*), this area separates Washington Creek from agricultural land. Finally, a  
155 conventional agricultural field (AGR) was included in the study for further comparison, the field is  
156 tile-drained under conventional tillage system, currently under a corn-soybean rotation.

157

## 158 **2.2 Methane flux measurement and processing**

159 Seasonal CH<sub>4</sub> fluxes were measured at each site during the frost-free period (spring-summer-fall) from  
160 March to November in 2017 and 2018 (Baskerville et al. 2021). For this study, we focused on CH<sub>4</sub>  
161 fluxes from March 8 to November 14, 2018. A detailed description of CH<sub>4</sub> fluxes measurements  
162 procedures is provided by Baskerville et al. (2021), briefly, CH<sub>4</sub> fluxes were measured biweekly in  
163 four static chambers that were randomly placed within a 5 x 30 m area within each RBS, directly  
164 adjacent to the stream's edge. Static chamber anchors (25 cm height, 10 cm radius) were constructed  
165 of white PVC piping inserted into a 10 cm soil depth. Chamber caps were removed after each  
166 sampling time, and soil was exposed to air between sampling dates. Gas samples were analyzed using  
167 an Agilent 6890 Gas Chromatograph (Agilent Technologies, Inc., Santa Clara, CA, USA). CH<sub>4</sub> flux  
168 ( $\mu\text{g CH}_4 \text{ m}^{-1} \text{ h}^{-1}$ ) was determined by the linear or curvilinear equation model, according to the best fit  
169 (Hutchinson and Mosier, 1981). Cumulative CH<sub>4</sub> emissions during the period (~245 days) were  
170 estimated for purpose of better data visualization. Calculations included averaging CH<sub>4</sub> flux between  
171 two consecutive sampling dates, multiplied by 24 hours plus the number of days elapsed between that  
172 dates, and summing to the estimated values from previous sampling days.



173

### 174 **2.3 Soil sampling**

175 Soil samples were collected biweekly, concurrently with GHG flux measurements from March to  
176 November 2018. In each RBS four 1 m<sup>2</sup> sub-plots, adjacent to each GHG chamber, were established.  
177 Each time, four soil samples were collected from each sub-plot with a soil auger to a 10 cm depth. 2 g  
178 of soil was immediately transferred into pre-weighed sterile tubes containing 3 ml of LifeGuard soil  
179 preservation solution (Qiagen, Toronto, CA) to stabilize the RNA. Tubes were immediately stored on  
180 ice, transported to the laboratory, stored -80 °C and extracted for soil RNA and DNA within 3 weeks.  
181 The remaining soil was stored for physicochemical analyses at 4 °C. For this study, we selected two  
182 sample dates in 2018 (July 04 and August 15; hereafter referred to as “Jul04” and “Aug15) for soil  
183 physicochemical and microbial analyses. The dates were selected based on CH<sub>4</sub> fluxes differences  
184 among the RBS (i.e., on Jul04 and Aug15, some RBS had CH<sub>4</sub> emissions peaks while others showed  
185 maximum consumption).

186

### 187 **2.4 Soil physicochemical analysis**

188 Soil moisture (%) and temperature (°C) were obtained from each soil sample location using an HH2-  
189 WET Sensor (Delta T Devices, Cambridge, UK). Measurements were made bi-weekly at the time of  
190 gas measurements and were taken to a 10 cm depth. Soil pH was determined on 10 g soil diluted in  
191 deionized water, stirred, and allowed to sit for 1 hour, pH was measured using calibrated pH meter.  
192 Total soil carbon (TC) and total nitrogen (TN) were determined using air-dried soil samples sieved to  
193 2 mm and analyzed on an elemental analyzer (CN 628, LECO Instruments, Canada), these data was  
194 gently provided by Dr. Kira A. Borden (Borden et al., 2021). Available ammonium (NH<sub>3</sub>) and nitrate  
195 (NO<sub>3</sub>) were determined on 5 g of air-dried soil, mixed with KCl for 15 minutes at 180 rpm using a

196 reciprocating shaker, then filtered through Whatman 42 filter paper, and analyzed using a Shimadzu  
197 1800 UV-Vis Spectrophotometer (Shimadzu Corp., Kyoto, Japan) at 640 nm to determine NH<sub>3</sub>, and  
198 540 nm to determine NO<sub>3</sub>. Soil bulk density (SBD) was determined from collected soil cores with  
199 predetermined volume. The soil was weighed, dried at 105°C for 4 days, and reweighed after drying.

200

## 201 **2.5 RNA and DNA extraction**

202 Soil samples in Lifeguard preservation solution were centrifuged, and the sediments were used to  
203 coextract the total RNA and DNA using the RNeasy PowerSoil Total RNA isolation kit and the DNA  
204 elution kit according to the manufacturer's protocol (Qiagen<sup>®</sup>, Valencia, CA). To eliminate potential  
205 contaminant DNA in RNA samples, RNase-free DNase (Promega GmbH, Mannheim, Germany) was  
206 added to 8µl of RNA in reaction tubes in triplicates. The purified RNA was reverse transcribed into  
207 single-stranded complementary DNA (cDNA) using the Applied Biosystems<sup>®</sup> High-Capacity cDNA  
208 Reverse Transcription Kit (Life Technologies, Burlington, Canada) as recommended by the  
209 manufacturer. Both cDNA and DNA were quantified using a Qubit<sup>™</sup> 4.0 fluorometer (Life  
210 Technologies, Burlington, Canada) and samples were subjected to inhibitory tests to determine  
211 appropriate dilutions for quantitative real-time PCR (qPCR).

212

## 213 **2.6 Quantitative PCR**

214 The abundance of methanogens and methanotrophs was assessed through qPCR assays targeting the  
215 marker genes *mcrA*, and *pmoA* and *mmoX*, respectively, in both DNA and cDNA. For each assay,  
216 standard curves were constructed using ten-fold serial dilutions based on gBlocks gene fragments  
217 (Blazjewski et al., 2019) constructed for each target sequence (gBlocks<sup>™</sup>, Integrated DNA  
218 Technologies, Inc, USA) following MIQE guidelines for qPCR assays. The primer sets and

219 thermocycling conditions are presented in Supplementary Table 1. The qPCR reaction consisted of 10  
220  $\mu\text{L}$  of  $1\times$  SYBR green supermix (Bio-Rad Laboratories, Inc.),  $1\ \mu\text{L}$  ( $10\ \mu\text{M}$ ) of each forward and  
221 reverse primers,  $2\ \mu\text{L}$  of DNA or cDNA template (1 to  $10\ \text{ng}/\mu\text{L}$ ) and  $6\ \mu\text{L}$  of DNase-free water to  
222 make a final volume of  $20\ \mu\text{L}$ . The results were expressed in Log gene copy numbers per g of dry soil  
223 (gene copy  $\text{g}^{-1}$ ).

224

## 225 **2.7 High-throughput amplicon sequencing**

226 High-throughput sequencing of  $\text{CH}_4$ -cycling communities was performed on both DNA and cDNA  
227 from soil samples collected on Jul04. In order to achieve high sequencing coverage of methanogens  
228 and methanotrophs, different sequencing strategies of amplicon sequencing were used for each group.  
229 For methanogens, libraries were constructed using PCR products obtained after amplification using the  
230 primer set Arch340F/806rb (Supplementary Table 1) that targets specific V4/V5 region of archaeal  
231 16S rRNA gene, which allows for obtaining  $\sim 75\%$  of archaeal sequences (Bahram et al., 2019). For  
232 methanotrophs, libraries were constructed using the *pmoA* gene; to target the broad diversity of *pmoA*  
233 sequences, a nested PCR (nPCR) procedure was adopted as described by Deng et al. (2019). Briefly,  
234 the primer set A189- A682r (Supplementary Table 1) was used in the 1st round as they provide  
235 broader coverage of *pmoA* diversity, but these primers also detect *amoA* sequence (from ammonia-  
236 oxidizing bacteria). Then, a specific primer set was used in the 2nd round of nPCR, which included the  
237 forward primer A189f and two reverse primers mb661r/650r (Supplementary Table 1). Library  
238 preparation and sequencing were performed according to standard protocols at Génome Québec  
239 Innovation Centre from McGill University, Montréal (Québec) Canada. High-throughput sequencing  
240 was performed using an Illumina MiSeq platform (Illumina Inc., USA).

241

## 242 **2.8 Bioinformatics and sequencing data processing**

243 Demultiplexed reads packages were pre-processed and analyzed using the QIIME2 pipeline v. 2021.8  
244 (Bolyen et al., 2019). Briefly, data cleaning and merging of mate reads, including chimeras removal,  
245 was performed using DADA2 via q2-dada2 (Callahan et al., 2016); this approach enables sequence  
246 analysis resolution down to the single-nucleotide level, thus resolving each amplicon sequence variant  
247 (ASV). To explore the phylogenetic diversity in each data set, the representative ASVs were aligned  
248 using the MAFFT algorithm (Kato, 2002) via q2-alignment plugin, then the alignments were used to  
249 construct the phylogeny following FastTree2 method (Price et al., 2010) via q2-phylogeny. The  
250 phylogenetic trees were visualized and edited using the iTOL platform (<http://itol.embl.de>) (Letunic  
251 and Bork, 2016).

252 Taxonomic assignment of ASVs was performed using QIIME2 q2-feature-classifier plugin  
253 (Bokulich et al., 2017), however different strategies were used for each marker. In archaeal 16S  
254 sequences, taxonomic identification was performed using the Classify-Sklearn Naive Bayes method,  
255 using a pre-trained classifier (99%) based on the primers Arch340F/806rb and 16S rRNA SILVA  
256 database v.138 (Quast et al., 2012). For *pmoA*, quality filtered ASVs were annotated (99%) following  
257 the classify consensus Vsearch method, which is based on the alignment of query sequences to a  
258 reference sequence panel. As a reference panel, we used a *pmoA* gene sequence database, available  
259 online at GFZ Data Services platform (Yang et al., 2016).

260

## 261 **2.9 Statistical analyses**

262 The experimental design in this study is pseudo-replicated since no other stream with similar riparian  
263 zone age, vegetation types, rehabilitation practices, land-use management, and environmental  
264 conditions existed in the region under study; we acknowledge that this limits the universality and

265 applicability of our results. Statistical analyses on CH<sub>4</sub> fluxes were performed by Baskerville et al.  
266 (2021). Briefly, Linear mixed models (LMMs) were run to determine differences in CH<sub>4</sub> flux among  
267 RBS and seasons. The qPCR data were compared between land uses using *t*-test for multiple  
268 comparisons, including Holm-Sidak correction (alpha=0.05). Differences between soil parameters  
269 (e.g., TC, TN, C/N, SBD, and pH) as determined by days July 04 and August 15 were compared using  
270 Tukey's multiple comparison test (alpha=0.05) and displayed using principal component analysis  
271 (PCA).

272 Microbial diversity of the methanotrophic and archaeal communities was compared between  
273 land uses, based on phylogenetic metrics of alpha (i.e., Faith Phylogenetic Index) and beta (i.e.,  
274 unweighted UniFrac distance) diversity. Comparison of alpha and beta diversity metrics were  
275 performed using pairwise Kruskal-Wallis and PERMANOVA tests, respectively. Principal coordinates  
276 analyses (PCoA) based plots on unweighted UniFrac distances derived from DNA and cDNA  
277 sequencing data were compared using Procrustes analysis, as implemented in QIIME2. In addition, the  
278 correlations between unweighted UniFrac distance matrix and soil properties distance matrix were  
279 analyzed using Mantel's test based on Spearman's rank correlation coefficients.

280 Co-occurrence networks were used to analyze and visualize associations of CH<sub>4</sub> flux, soil  
281 properties and soil microbes. Networks were generated using the CoNet alpha plugin  
282 (<http://psbweb05.psb.ugent.be/conet>) (Faust and Raes, 2016) in Cytoscape v.3.8.0 (Shannon, 2003).  
283 CoNet is an ensemble-based network inference tool designed to detect non-random patterns of  
284 microbial co-occurrence using multiple correlations and similarity measures. Briefly, networks were  
285 calculated on methanogen and methanotroph sequencing data (genus level) across 15 samples, filtered  
286 to a minimum of 5 and 10 reads for cDNA and DNA, respectively. An additional metadata with soil  
287 properties was added as a "feature matrix" in order to detect relationships between taxa and

288 environmental variables. Pairwise associations among taxa/soil properties were calculated using  
289 Pearson, Spearman and Kendall correlation methods simultaneously (1000 permutations). Edges were  
290 retained when supported by at least two correlation methods (coefficient > 0.35) and  $p$  values below  
291 0.05. Networks visualized with Gephi v.0.9.2 (Bastian et al., 2009).

## 292 **3 Results**

### 293 **3.1 Seasonal CH<sub>4</sub> fluxes from different riparian buffer systems at Washington creek**

294 Seasonal CH<sub>4</sub> fluxes in 2018 ranged from -140 to 1233  $\mu\text{g CH}_4\text{-C m}^{-2} \text{h}^{-1}$ . The average CH<sub>4</sub> fluxes in  
295 the UNF site, with a mean of 1233  $\mu\text{g CH}_4\text{-C m}^{-2} \text{h}^{-1}$  were significantly higher ( $p < 0.001$ ) compared to  
296 GRB (-6  $\mu\text{g CH}_4\text{-C m}^{-2} \text{h}^{-1}$ ), RH (-61  $\mu\text{g CH}_4\text{-C m}^{-2} \text{h}^{-1}$ ), CF (29  $\mu\text{g CH}_4\text{-C m}^{-2} \text{h}^{-1}$ ), and AGR site (-  
297 120  $\mu\text{g CH}_4\text{-C m}^{-2} \text{h}^{-1}$ ). Accordingly, cumulative CH<sub>4</sub> emissions were observed at the UNF site,  
298 whereas the CH<sub>4</sub> flux was kept close to zero in the CF RBS soils, and a trend to CH<sub>4</sub> uptake was  
299 observed in GRB, RH and AGR sites (Figure 2a). Furthermore, several hot moments of CH<sub>4</sub> fluxes  
300 were detected at the UNF RBS in all the seasons, and less frequent hot moments of CH<sub>4</sub> fluxes were  
301 observed at the CF RBS site, and even at GRB, RH and AGR soils (Figure 2b). Based on these data,  
302 we selected July 04 (Jul04) and August 15 (Aug15) sampling dates for microbial analyses, specifically  
303 because contrasting CH<sub>4</sub> fluxes were recorded in some RBSs on those days (i.e., methane emission



304 peaks at UNF and higher CH<sub>4</sub> uptake rates at GRB).

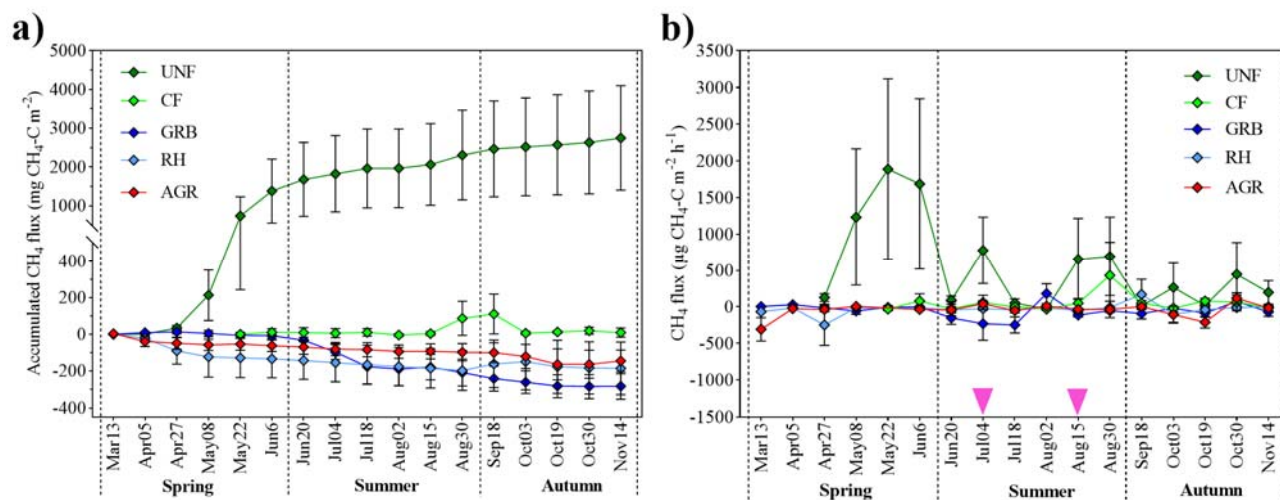

305

306 **Figure 2.** Seasonal CH<sub>4</sub> flux during the frost-free period at different riparian buffer systems in the  
 307 riparian zone of Washington creek in southern Ontario, including a grassed buffer (GRB), a  
 308 rehabilitated forest buffer (RH), an undisturbed deciduous forest (UNF), a coniferous forest (CF), and  
 309 adjacent agricultural field (AGR). Bi-weekly measurements of CH<sub>4</sub> flux were conducted in four  
 310 chambers at each site. **a)** Cumulative CH<sub>4</sub> emissions corresponding to the full sampling period. **b)**  
 311 Methane flux recorded on each sampling day. The dots represent the mean and the standard mean  
 312 error. July 04 and August 15 were the sampling dates selected for soil microbial analyzes.

313

### 314 3.2 Abundance of methanogens and methanotrophs across different RBSs

315 Methanotroph abundance determined by *pmoA* and *mmoX* gene quantities was lowest in AGR soil  
 316 compared to forests (UNF and CF) and rehabilitated tree buffer (RH) for both sampling days (Figure  
 317 3a,b). Specifically, methanotrophs harboring *pmoA* gene were less abundant in AGR than in GRB  
 318 (Jul04:  $p=0.003$ ; Aug15:  $p<0.001$ ), and RH, CF, and UNF ( $p<0.001$ ). Similar results were observed in  
 319 *mmoX* gene abundance, except for less consistent differences between an AGR and GRB  
 320 (Jul04:  $p=0.18$ ; Aug15:  $p=0.02$ ). Besides, the abundance of methanogens (*mcrA* gene) was higher in  
 321 CF soils on Jul04. On Aug15 the abundance of *mcrA* was higher in forest CF and UNF soils. On the

322 other hand, gene expression based on cDNA revealed a similar pattern among different land uses, with  
 323 lower gene transcripts of *pmoA* and *mmoX* in AGR soils, and the highest abundance of *pmoA* and  
 324 *mcrA* at CF and UNF sites (Figure 3c,d).

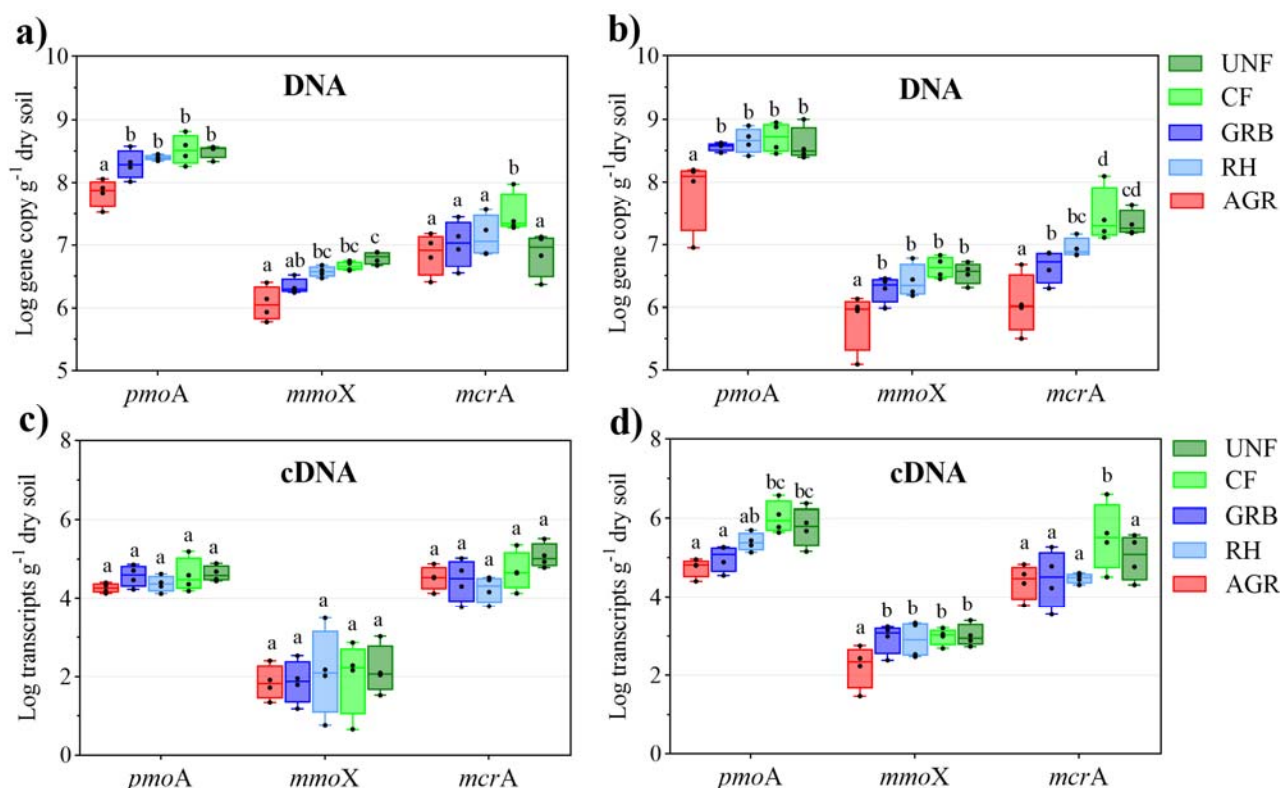

325  
 326 **Figure 3.** Abundance of the *mcrA* (methanogens), and *pmoA* and *mmoX* genes (methanotrophs) at  
 327 different land-use sites. The quantification was performed using qPCR assays targeting DNA from soil  
 328 samples collected on (a) July 04 (Jul04), and (b) August 15 (Aug15). For cDNA samples,  
 329 quantifications of gene transcripts are presented for (c) Jul04 and (d) Aug15. Different letters within  
 330 the same group (i.e., for each gene) indicate significant differences between land uses (Tukey HSD,  $p <$   
 331 0.05)

### 332 3.3 Community composition and activity of methanogens in the different RBSs

333 A total of 411 and 325 ASVs were annotated as archaea in DNA and cDNA data, respectively. These  
 334 ASVs belonged to at least 14 well-defined archaeal orders, in which the order Woesearchaeales  
 335 comprised a large proportion of ASVs in both datasets (Supplementary Figure S2). Total archaeal

336 community composition in AGR soils was significantly different from those in the forest (CF and  
337 UNF) and riparian (GRB and RH) soils in both DNA ( $F=1.82$ ;  $p=0.002$ ) and cDNA ( $F=1.45$ ;  $p=0.04$ )  
338 (Supplementary Figure S3). Overall, archaea from the order Nitrososphaerales comprised most of the  
339 community profile in both DNA and cDNA data (Supplementary Figure S4). Besides,  
340 Nitrososphaerales, Woesearchaeales and Nitrosopumilales were also highly abundant in DNA  
341 sequencing data, whereas cDNA profiles had a high abundance of Bathyarchaeia and the  
342 methanogenic order Methanosarciniales. In further analysis, we selected the ASVs that were annotated  
343 as methanogens.

344 Methanogens from six orders were detected in both DNA and cDNA datasets (Figure 4). A total  
345 of 33 ASVs in the DNA data were classified as methanogens, among which the most abundant were  
346 the genera *Methanosaeta* and *Methanosarcina* from the order Methanosarciniales (36%, 12/33),  
347 followed by 8 ASVs (24.2%) as *Methanomassiliicoccus* (Methanomassiliicoccales), and 7 (21.2%) as  
348 *Methanoregula* (Methanomicrobiales). Overall, the highest abundance of that ASVs was detected in  
349 UNF soils (Figure 4a). In cDNA data, a higher number of ASVs (total of 52) were assigned as  
350 methanogens compared with the DNA data set (Figure 4b), wherein Methanosarciniales were also the  
351 most abundant taxa (36.5%, 19/52). A higher number of ASVs from the order Methanomicrobiales  
352 (38.5%, 20/52) was observed also in the cDNA dataset, which most often consisted of the genera  
353 *Methanoregula* and *Methanospirillum*. Consistent with the distribution of the methanogens across land  
354 use from DNA data, the highest abundance of active methanogens (63.5%) was found at the UNF  
355 soils, thus consistent with the highest methane emission detected at this site.

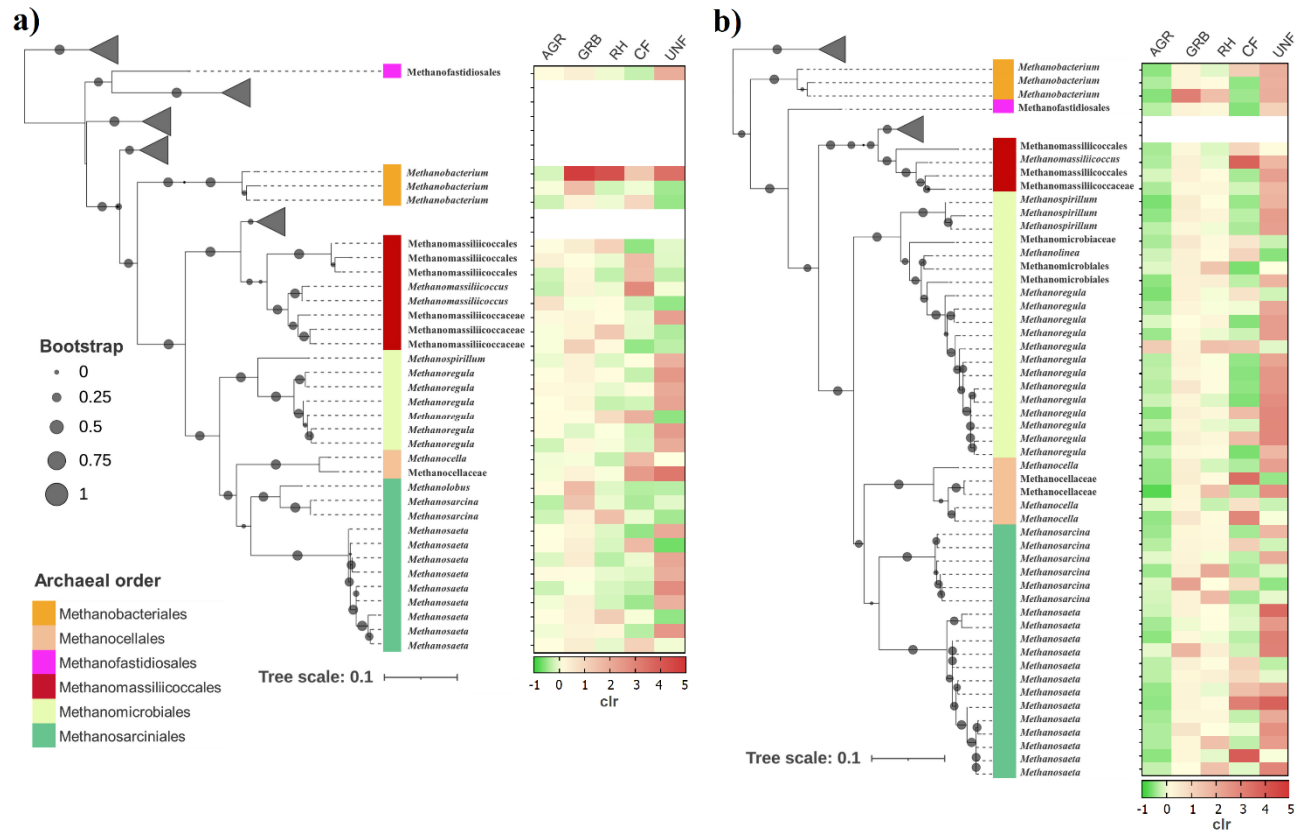

356  
 357 **Figure 4.** Maximum likelihood phylogenetic tree of ASVs from methanogens detected by DNA and  
 358 cDNA sequencing from different land uses. Phylogenetic tree from (a) DNA and (b) cDNA sequences  
 359 assigned as methanogens. The ASVs are identified at the order level and classified as genus or family  
 360 when possible. Other clades containing non-methanogenic archaea are collapsed. In the heatmaps, the  
 361 ASVs are presented as the average of their proportional distribution (clr: centered log-ratio  
 362 transformed) among samples in each land use.

363

### 364 3.4 Diversity and taxonomic composition of the methanotrophic community

365 A difference in taxonomic richness of the *pmoA* DNA was observed between AGR and GRB soils  
 366 ( $H=4.1$ ;  $p=0.04$ ). However, no significant differences were also observed between land uses in cDNA-  
 367 based *pmoA* sequencing. No significant differences were found in community evenness between soils  
 368 from both DNA and cDNA data (Supplementary Figure S5). Analysis of  $\beta$ -diversity (i.e., based on  
 369 unweighted UniFrac distances) revealed significant differences between AGR and riparian soils as

370 confirmed on both DNA ( $F=3.45$ ;  $p=0.001$ ) and cDNA ( $F=2.26$ ;  $p=0.02$ ) sequencing data  
371 (Supplementary Figure S5).

372 Distinct taxonomic composition of the methanotroph community was observed in AGR soils  
373 compared to riparian (UNF, CF, GRB and RH) soils. On DNA-based sequences, a total of 297 ASVs  
374 were detected, which were classified into 13 taxons (at genus level) mostly from the phylum  
375 Proteobacteria (99%, 294/297), split into the classes Alphaproteobacteria (72.7%, 216/297) and  
376 Gammaproteobacteria (26.3%, 78/297). In addition, 1% (3/297) of the sequences were identified as  
377 “environmental\_samples” at phylum level, and as the class “uncultured\_bacterium (pxmA)”, thus  
378 identified as unclassified\_Bacteria (MOB\_like) for purposes of this work. At genus level, most ASVs  
379 (66.6%, 198/297) were identified as *Methylocystis*, followed by Tropical Upland Soil Cluster (TUSC\_  
380 pxmA) (9%, 27/297), type Ib methanotrophs belonging to Rice Paddy Cluster 1 (RPC-1) (7%,  
381 21/297), type Ib (FWs) (3%, 9/297), typeIb (RPCs) (2.6%, 8/297) and type Ib Lake Washington  
382 Cluster (LWs) (2.3%, 7/297) (Figure 5a). Comparing land use, *Methylocystis* was mostly detected (>  
383 98%) in riparian zones (UNF, CF, GRB and RH), whereas AGR soils had a high proportion of TUSC  
384 (pxmA), type Ib rice paddy cluster 1(RPC-1), type Ib (RPCs), followed by type Iib (USC-alpha)  
385 (Figure 5b).

386 With cDNA-based sequencing, due to low sequencing coverage, some replicates were lost  
387 during the sequence denoising process. A total of 86 ASVs were detected, from which 74.4% (64/86)  
388 and 23.2% (20/86) were Alphaproteobacteria and Gammaproteobacteria respectively, while 3.5%  
389 (3/87) were annotated as unclassified\_Bacteria (MOB\_like). Similar to DNA profiles, *Methylocystis*  
390 comprised most of the ASVs detected at genus level (54.7%, 47/86), followed by  
391 unclassified\_Alphaproteobacteria (15.1%, 13/86) and Type Ib (RPC-1) (10.4%, 9/86) (Figure 6c). The  
392 taxonomic composition of the methanotrophs in AGR soils was also distinct compared to all other



393 riparian buffer sites. *Methylocystis* was the predominant active methanotrophs taxa in CF, GRB and  
394 RH soils, while in AGR soil the most abundant were type Ib (RPC-1), Type Ib (RPCs) and type IIb  
395 (USC $\alpha$ ). However, differently from DNA-based sequencing, the active methanotrophs in the UNF  
396 forest predominantly consisted of unclassified\_ Alphaproteobacteria, and one sample comprised ASVs  
397 assigned as unclassified\_Bacteria (MOB\_like) (Figure 5d). These two taxa are likely to be closely  
398 related genetically as they consistently clustered together in phylogenetic trees from both DNA and  
399 cDNA sequences (Figure 5c). Yet, it was not possible to refine the taxonomic classification of these  
400 taxa to other hierarchical levels (i.e., order, family or genus).

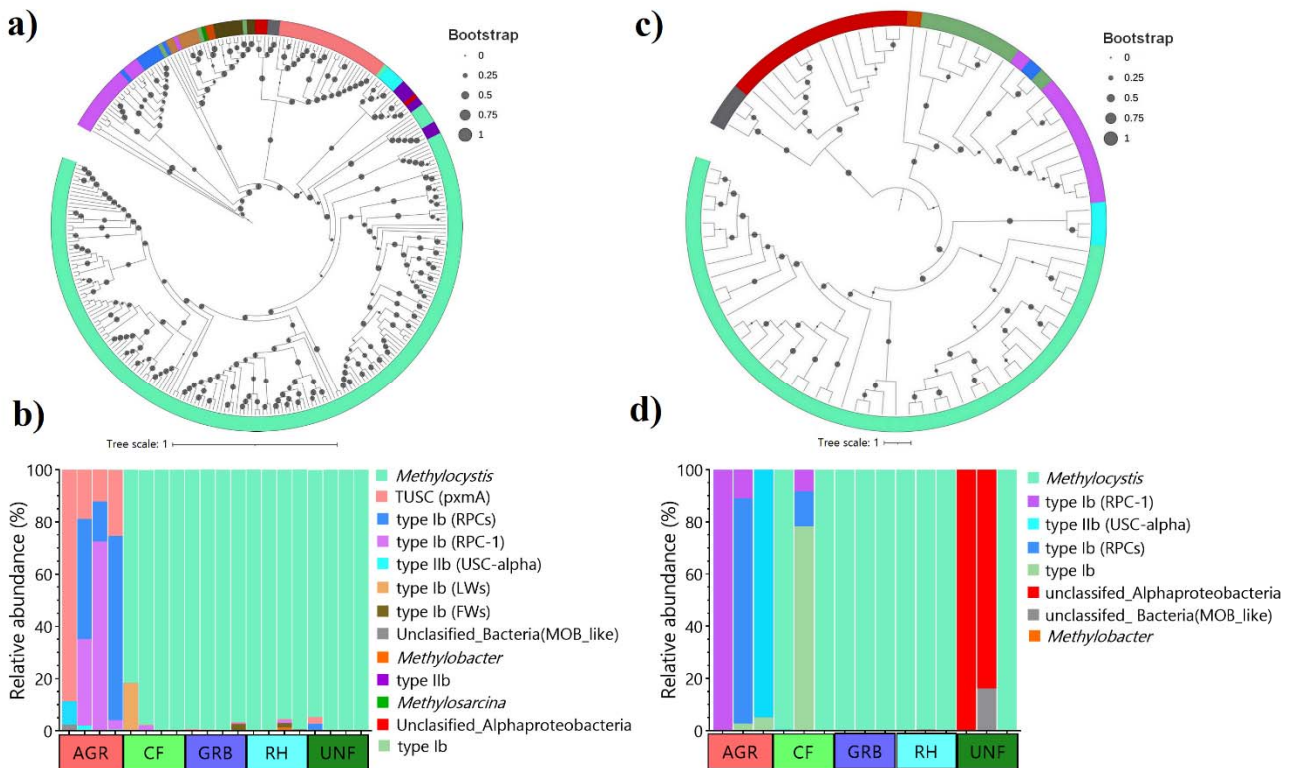

401  
402 **Figure 5.** Taxonomic composition of methanotrophs at different land-use sites. The upper panel  
403 indicates the phylogenetic arrangement of *pmoA* sequences detected from (a) DNA and (c) cDNA  
404 sequencing data. The bottom panel shows the taxonomic composition at genus level based on both (b)  
405 DNA and (d) cDNA from each sample across five land use sites.

406



### 407 3.5 Analysis of edaphic factors across land uses

408 Analysis of soil temperature of the soils collected for microbial analysis revealed no significant  
 409 differences between land uses (Table 1). Although not significant, the average temperatures detected  
 410 in GRB and AGR soils were ~2°C higher than in CF and UNF forests and RH soils. However, soil  
 411 moisture was higher on sites with canopy coverage (UNF, CF and RH) when compared to other soils,  
 412 especially in the UNF where soil moisture was three times higher than in GRB or AGR. Differences  
 413 were also observed in TC in both sampling days, with a gradient from low TC content in AGR soils to  
 414 high TC content in the CF and UNF. A similar gradient was observed for TN and NH<sub>3</sub> from low  
 415 content in AGR to higher contents forest sites (CF and UNF), although the differences were  
 416 statistically significant only for NH<sub>3</sub>. Interestingly, the NO<sub>3</sub> content was increased in GRB and RH but  
 417 just on August 15. No significant differences were observed in soil C/N ratio or pH ( $p>0.05$ ).

418 **Table 1.** Soil properties from each RBS on average (mean and SD) over the soil sampling dates (July  
 419 04 and August 15).

| Factor          | Unit               | Date  | AGR                   | GRB                     | RH                      | CF                      | UNF                     |
|-----------------|--------------------|-------|-----------------------|-------------------------|-------------------------|-------------------------|-------------------------|
| Temp            | °C                 | Jul04 | 27.9±1.3 <sup>a</sup> | 28.2±4.0 <sup>a</sup>   | 25.6±1.9 <sup>a</sup>   | 24.5±1.3 <sup>a</sup>   | 23.1±2.6 <sup>a</sup>   |
|                 |                    | Aug15 | 23.4±1.6 <sup>a</sup> | 26.0±0.6 <sup>a</sup>   | 22.8±0.4 <sup>a</sup>   | 21.7±2.0 <sup>a</sup>   | 23.2±1.6 <sup>a</sup>   |
| Moist           | %                  | Jul04 | 14.5±0.5 <sup>a</sup> | 16.7±7.8 <sup>a</sup>   | 29.6±6.9 <sup>ab</sup>  | 31.8±21.1 <sup>ab</sup> | 41.6±18.9 <sup>b</sup>  |
|                 |                    | Aug15 | 15.5±1.8 <sup>a</sup> | 14.6±2.69 <sup>a</sup>  | 26.9±10.7 <sup>ab</sup> | 31.7±22.4 <sup>ab</sup> | 52.6±7.3 <sup>b</sup>   |
| SBD             | g cm <sup>-3</sup> | Jul04 | 1.1±0.1 <sup>a</sup>  | 0.8±0.1 <sup>a</sup>    | 0.9±0.2 <sup>a</sup>    | 0.6±0.04 <sup>a</sup>   | 0.5±0.1 <sup>a</sup>    |
|                 |                    | Aug15 | 1.1±0.2 <sup>a</sup>  | 0.8±0.1 <sup>a</sup>    | 0.91±0.1 <sup>a</sup>   | 0.5±0.1 <sup>a</sup>    | 0.6±0.2 <sup>a</sup>    |
| TC              | g kg <sup>-1</sup> | Jul04 | 28.3±1.4 <sup>a</sup> | 74.6±1.8 <sup>c</sup>   | 70.6±16.6 <sup>cd</sup> | 116.3±17.9 <sup>b</sup> | 140.2±40.1 <sup>c</sup> |
|                 |                    | Aug15 | 29.8±2.2 <sup>a</sup> | 75.9±4.1 <sup>c</sup>   | 73.1±14.1 <sup>c</sup>  | 129.1±25.0 <sup>b</sup> | 139.9±39.7 <sup>b</sup> |
| TN              | g kg <sup>-1</sup> | Jul04 | 2.8±0.2 <sup>a</sup>  | 5.2±0.4 <sup>a</sup>    | 4.9±1.7 <sup>a</sup>    | 8.2±1.6 <sup>a</sup>    | 9.4±2.4 <sup>a</sup>    |
|                 |                    | Aug15 | 2.9±0.2 <sup>a</sup>  | 5.4±0.7 <sup>a</sup>    | 5.0±1.9 <sup>a</sup>    | 8.8±2.0 <sup>a</sup>    | 9.3±2.2 <sup>a</sup>    |
| C/N             | -                  | Jul04 | 9.9±0.2 <sup>a</sup>  | 14.3±0.7 <sup>a</sup>   | 14.9±1.6 <sup>a</sup>   | 14.3±1.3 <sup>a</sup>   | 14.8±0.7 <sup>a</sup>   |
|                 |                    | Aug15 | 10.1±0.4 <sup>a</sup> | 14.3±1.3 <sup>a</sup>   | 14.7±1.1 <sup>a</sup>   | 14.8±0.9 <sup>a</sup>   | 14.9±0.8 <sup>a</sup>   |
| NH <sub>3</sub> | g kg <sup>-1</sup> | Jul04 | 1.7±0.6 <sup>a</sup>  | 6.5±1.9 <sup>a</sup>    | 10.7±4.0 <sup>a</sup>   | 20.0±5.9 <sup>a</sup>   | 44.9±16.3 <sup>b</sup>  |
|                 |                    | Aug15 | 3.3±2.1 <sup>ad</sup> | 33.9±12.2 <sup>cd</sup> | 24.2±10.8 <sup>d</sup>  | 77.0±21.9 <sup>b</sup>  | 105.9±49.6 <sup>c</sup> |
| NO <sub>3</sub> | g kg <sup>-1</sup> | Jul04 | 15.5±1.8 <sup>a</sup> | 21.9±5.5 <sup>a</sup>   | 15.4±13.9 <sup>a</sup>  | 18.2±14.1 <sup>a</sup>  | 14.3±8.8 <sup>a</sup>   |

|    |       |                       |                        |                         |                         |                        |
|----|-------|-----------------------|------------------------|-------------------------|-------------------------|------------------------|
| pH | Aug15 | 11.3±2.3 <sup>a</sup> | 47.3±23.0 <sup>b</sup> | 34.3±21.2 <sup>ab</sup> | 22.9±20.4 <sup>ab</sup> | 19.2±16.2 <sup>a</sup> |
|    | Jul04 | 7.2±0.2 <sup>a</sup>  | 7.5±0.2 <sup>a</sup>   | 7.6±0.1 <sup>a</sup>    | 7.1±0.2 <sup>a</sup>    | 7.1±0.2 <sup>a</sup>   |
|    | Aug15 | 7.3±0.1 <sup>a</sup>  | 7.5±0.2 <sup>a</sup>   | 7.7±0.1 <sup>a</sup>    | 7.1±0.2 <sup>a</sup>    | 7.2±0.2 <sup>a</sup>   |

420 \*Different letters in each soil parameter (<sup>abc</sup>) represent significant differences among land uses  
421 ( $p < 0.05$ ). Temp.: soil temperature; Moist.: soil moisture; SBD: soil bulk density; TC: total soil carbon;  
422 TN: total nitrogen; C/N: Carbon-to-nitrogen ratio; NH<sub>3</sub>: available ammonium; NO<sub>3</sub>: nitrate, pH: soil  
423 pH.

424 Principal component analysis (PCA) based on soil edaphic factors, including CH<sub>4</sub> flux, revealed  
425 significant differences ( $F = 6.30$ ;  $p < 0.001$ ) between land uses. Overall, an overlap of riparian buffer  
426 soils (GRB and RH) was observed, associated with soil pH and temperature, whereas natural forest  
427 soils (UNF and CF) clustered together, associated with soil moisture and nutrient content. Agricultural  
428 soil samples showed a clear distance from other sites which was associated with SBD (Supplementary  
429 Figure S6).

430

### 431 **3.6 Co-occurrence of methane cycling taxa and their association with soil edaphic factors**

432 To explore the association between methane cycling taxa and soil conditions, we constructed co-  
433 occurrence networks based on three data matrices, including all the samples from all land uses: i)  
434 abundance of methanogens, ii) abundance of methanotrophs, and iii) soil edaphic factors, and the same  
435 analysis was performed for both DNA and cDNA sequencing data. Different patterns of microbe-  
436 microbe interactions, as well as between taxa and soil factors, were observed when DNA or cDNA  
437 sequencing data were explored (Figure 6). In the DNA-based network, soil C, temperature, moisture  
438 and NH<sub>3</sub>, were the most influential environmental factors, with eigencentality of 0.91, 0.90, 0.85 and  
439 0.78 respectively. Soil temperature had mainly positive correlations with methanotrophs [e.g., TUSC  
440 and type Ib (RCP-1)], while soil moisture was positively linked to methanogens (Figure 6a). Thirteen  
441 methanogens were detected in the DNA-based co-occurrence network, with an average degree (i.e.,



458 and node size reflects eigencentality, which is indicative of the influence of the node on the networks.  
459 Edges between nodes represent significant negative (red) and positive (green) correlations, calculated  
460 from Pearson, Spearman, and Kendall correlation methods simultaneously ( $p < 0.05$ ).

#### 461 **4 Discussion**

462 Riparian buffers are one of the most common agroforestry practices in Canada, and they are promoted  
463 to stabilize eroding banks of water bodies, but also to reduce nutrient runoff from adjacent agricultural  
464 land use, and protect the aquatic ecosystems (Oelbermann et al., 2008). However, RBS can also be  
465 source of CH<sub>4</sub> emissions due to favorable environmental conditions (i.e., the presence of a high water  
466 table, and carbon addition as litterfall) (Dinsmore et al., 2009b; Jacinthe et al., 2015; Vidon et al.,  
467 2015, 2014). As previously described by Baskerville et al. (2021), amongst the RBS present at  
468 Washington Creek, southern Ontario, only the UNF RBS site acted as a hot spot of CH<sub>4</sub> emissions,  
469 while all other RBS typically acted as CH<sub>4</sub> sinks. Based on biweekly measurement of CH<sub>4</sub> fluxes  
470 performed by Baskerville et al. (2021) during the frost free period in 2018, we identified hot moments  
471 of CH<sub>4</sub> flux and selected two dates from summer (July 04 and August 15) for microbial analyses. Soil  
472 sampling from those days were used to assess the CH<sub>4</sub> cycling microbial communities across these  
473 RBS. Specifically, we aimed to characterize the soil microbial communities involved in the production  
474 and consumption of CH<sub>4</sub> in these RBS.

475 To further address the CH<sub>4</sub>-cycling communities, in this study we not only determined  
476 differences in abundance, taxonomic and phylogenetic composition of methanogens and  
477 methanotrophs but also considered the activity of these taxa during CH<sub>4</sub> hot moments (i.e., high CH<sub>4</sub>  
478 emission peaks in UNF versus high oxidation rates in GRB in the sampling dates under study). This  
479 approach is particularly important for methanogenic archaea (e.g., the genera *Methanosarcina* and  
480 *Methanocella*), which are ubiquitous in many upland soils worldwide, often in the dormancy stage but  
481 could be readily activated when anoxic conditions occur (Angel et al., 2012). Moreover, studies in the

482 humid tropics suggest that soil biogeochemical dynamics can be accompanied by rapid shifts in CH<sub>4</sub>  
483 fluxes (Fernandes et al., 2002; O’Connell et al., 2018; Verchot et al., 2000). For example, O’Connell  
484 et al. (2018) found that high CH<sub>4</sub> uptake during drought periods was followed by a post-drought  
485 dramatic increase in CH<sub>4</sub> emissions that offsets sink in a few weeks.

486 The abundance of methanogens was higher in deciduous forest UNF, with lower abundance in  
487 agricultural soils (AGR), as measured by qPCR from DNA and cDNA (Figure 3). Methanogens from  
488 six different orders were detected in most soils, except for agricultural soils, where other non-  
489 methanogenic archaeal orders (e.g., Nitrososphaerales) were predominant. We detected the presence of  
490 acetoclastic methanogens (i.e., *Methanosaeta* and *Methanosarcina*), but also hydrogenotrophic (i.e.,  
491 *Methanoregula* and *Methanomicrobium*) (Nazaries et al., 2013) and H<sub>2</sub>-dependent methylotrophic  
492 (*Methanomassiliicoccus* and *Methanofastidiosa*) by DNA sequencing in all the RBS, mainly in the  
493 grassed buffer (GRB) and evergreen forest (CF). However, analysis of both DNA and cDNA  
494 sequencing data indicated that these taxa were most active in the UNF soil. These results not only  
495 coincide with the hot moments of CH<sub>4</sub> emissions observed in these soils but also with the high water  
496 content. The association between methanogens and soil moisture was also confirmed in co-occurrence  
497 networks, for example, an increased number of nodes from methanogens was detected in cDNA  
498 networks, which mostly were positively correlated with soil moisture, thus confirming the resilience of  
499 the methanogen community, which became active in response to favorable soil conditions.

500 To target the methanotroph community, we sequenced the functional gene *pmoA* instead of 16S  
501 rRNA gene, given that amplicon sequencing of the 16S rRNA gene often provides low sequencing  
502 coverage of methanotrophs since they constitute a small proportion within the total soil microbiota,  
503 and often it does not allow the identification of MOB taxa beyond known families (Knief, 2015). The  
504 *pmoA* gene is evolutionarily highly conserved and thus useful as a phylogenetic gene marker for

505 methanotrophs (Holmes et al., 1995). In addition, phylogenetic trees constructed based on *pmoA*  
506 sequences closely reflect those of 16S rDNA based phylogenies for the same MOB organisms  
507 (Dunfield et al., 2002; Knief, 2015). Our results suggest that the genus *Methylocystis* widely  
508 predominates vegetative riparian buffers in Washington Creek, including natural forests. *Methylocystis*  
509 is considered to be a generalist MOB, inhabiting upland forest and grassland soils, even some  
510 *Methylocystis* species inhabit frozen soils and wetlands (e.g., *M. sporium* in arctic wetland soil and *M.*  
511 *sporium* in rice paddy soil) (Knief, 2015; Zeng et al., 2019). Several *Methylocystis* spp. harbour a  
512 paralog of the *pmoA* gene (i.e., *pmoA2*), which encodes the methane monooxygenase enabling  
513 methane oxidation at lower mixing ratios (i.e., high-affinity methane oxidation, HAMO) (Knief, 2015;  
514 Kolb, 2009). These capabilities provide resilience to this genera in hydromorphic soils where they  
515 often face low methane supply (Knief, 2015).

516         However, we did not detect *Methylocystis* in agricultural (AGR) soils. We assumed that the  
517 distinction of MOB community on AGR soils was most likely a consequence of land use, since  
518 frequent disturbances due to agricultural practices and land-use change are known to affect CH<sub>4</sub>  
519 oxidation regardless of different climate and soil types (Tate, 2015). In particular, the non-detection of  
520 *Methylocystis* in AGR soils could be a consequence of changes in the C/N ratio, as our results revealed  
521 that only this taxon had positive correlations with C/N ratio in DNA- and cDNA-based networks.  
522 Moreover, due to the competitive inhibition of methane monooxygenase by ammonia, changes in  
523 nitrogen (N) cycling are recognized to have strong effects on CH<sub>4</sub> oxidation, thus affecting the  
524 abundance and diversity of methanotrophs (Nazaries et al., 2013; Tate, 2015). Yet, the dynamics  
525 between nitrogen and methane oxidation are not fully understood, as studies suggest that soil N,  
526 especially in the form of NH<sub>4</sub><sup>+</sup>, could either stimulate, inhibit, or exert no influence on soil CH<sub>4</sub>



527 (Bodelier, 2011; Szafranek-Nakonieczna et al., 2019). In this study, type II Alpha-MOB such as  
528 *Methylocystis* spp. thrive better in RBS soils with high NH<sub>3</sub> and TN (e.g., CF and UNF).

529 These results are in agreement with (Nyerges et al., 2010) who found that *Methylocystis* spp.  
530 were more tolerant to the inhibitory effects of ammonium than nitrate. On the other hand, MOB in  
531 agricultural soils comprised mostly of type Rice Paddy Clusters (RPC-1 and other RPCs) and Upland  
532 Soil Clusters (TUSC and USC $\alpha$ ). The RPC clusters are usually detected in rice paddy-associated  
533 habitats, but they could also be heterogeneous and inhabit diverse environments (e.g., the large  
534 RPC1\_3 cluster) (Knief, 2015). Surprisingly, TUSC and USC $\alpha$  in our study were more abundant in  
535 AGR soils, whereas these taxonomic groups are mostly associated with upland forest soils (Deng et  
536 al., 2019; Feng et al., 2020; Kou et al., 2020) and less frequent in intensively managed agricultural  
537 soils (Knief, 2015). Nevertheless, USCs have also been found in agricultural soils with high C content  
538 (Lima et al., 2014). Further studies are needed to address the drivers of the methanotrophs community  
539 at RBS at Washington Creek, Ontario.

540 The active methanotrophs in UNF RBS, were mostly only able to be classified at phylum level  
541 [i.e., unclassified\_Bacteria (MOB\_like) and unclassified\_Alphaproteobacteria]; however, their  
542 presence confirms that methanotrophic activity persists in these soils even at high soil moisture. In  
543 addition, these taxa were the only nodes of methanotrophs that positively correlated with CH<sub>4</sub> flux in  
544 the cDNA sequencing co-occurrence network. Our results are in agreement with Cai et al. (2016), who  
545 found that methane uptake is mediated by conventional methanotrophs even in periodically drained  
546 ecosystems. Yet, the fact that these taxa responded to increased soil moisture and high CH<sub>4</sub>  
547 concentrations, but were taxonomically unidentified according to the reference database, may suggest  
548 a novel taxonomic group in these soils. Further studies using a more comprehensive sequencing

549 approach (i.e., metagenomic sequencing) are needed in order to characterize the taxonomic, genomic,  
550 and functional traits of the methanotrophs in these ecosystems.

551

## 552 **5 Conclusions**

553 Riparian Buffer Systems (RBS) at Washington Creek, Southern Ontario, including rehabilitated forest  
554 buffers (RH), grassed buffers (GRB) and natural coniferous forest buffers (CF) have been proven to be  
555 sinks of atmospheric CH<sub>4</sub>, except for the natural deciduous forest buffer (UNF), which represents a  
556 hotspot for CH<sub>4</sub> emissions, most of which occurred during spring and summer days, associated with  
557 high soil C content and high soil moisture levels. We confirm the hypothesis that different methanogen  
558 and methanotroph taxa are ubiquitous in these RBS soils and are driven by different edaphic factors  
559 and environmental conditions. Methanogens from six taxonomic orders were present in all the RBS,  
560 with the highest abundance and taxonomic diversity at UNF, and associated with soil moisture and soil  
561 C content. Methanotrophs were also detected, and the main differences in taxonomic diversity were  
562 observed between RBS and the adjacent crop field (AGR). The *Methylocistys* spp. was discovered to  
563 be the most frequent methanotroph in RBS soils, but not in AGR soils where methanotrophs had low  
564 abundance and comprised mostly of members of Rice Paddy Clusters (RPC) and Upland Soil Cluster  
565 (USC). The findings of our study demonstrate the reliability of targeting both DNA and cDNA to  
566 measure diversity as well as the activity of CH<sub>4</sub>-cycling taxa for better understanding CH<sub>4</sub> flux  
567 patterns. Overall, these results should be considered when establishing riparian buffer systems in  
568 agricultural landscapes, which should be designed not only based on the adjacent land uses and  
569 topographic conditions, but also on vegetative systems that help to diminish the activity of  
570 methanogens and thus reduce CH<sub>4</sub> emissions.

571

572 **CRedit author contribution statement**

573 **Dasiel Obregon:** Conceptualization, Methodology, Software, Formal analysis, Investigation,  
574 visualization, Writing- Original draft. **Tolulope Mafa-Attoye:** Conceptualization, Methodology, Data  
575 curation, Writing- Review and editing. **Megan Baskerville:** Data curation, Methodology,  
576 Investigation. **Eduardo Mitter:** Software, Visualization, Writing- Reviewing and editing. **Leandro**  
577 **Fonseca:** Methodology, Investigation. **Maren Oelbermann:** Conceptualization, methodology,  
578 Writing- Reviewing and editing. **Naresh Thevathasan:** Conceptualization, Funding acquisition,  
579 Project administration. **Siu Mui Tsai:** Conceptualization, Supervision. **Kari Dunfield:**  
580 Conceptualization, Project management, Supervision, Writing- Reviewing and editing.

581 **Competing Interests**

582 The authors declare that they have no known competing financial interests or personal relationships  
583 that could have appeared to influence the work reported in this paper.

584 **Acknowledgements**

585 We are thankful to Brian and Elizabeth Tew and Josie and Jens Madsen for providing access to their  
586 land during the study period. We thank Kira A. Borden by provide us with the data (laboratory  
587 analisis) on total carbon (TC) and nitrogen (TN). We are grateful to Kamini Khosla for technical  
588 support.

589 **Funding**

590 This study was financially supported by research funds provided by the Agricultural Greenhouse Gas  
591 Program (AGGP) 12 administered by Agriculture and Agri-Food Canada, and the Natural Sciences  
592 and Engineering Research Council. Dasiel Obregon and Leandro Fonseca were supported by the São  
593 Paulo Research Foundation (FAPESP- 2014/50320-4; 2015/13546-7; 2016/24695-6; 2018/09117-1;

594 2018/05223-1).

## 595 **Data availability**

596 Most of the data have been included in the manuscript or the supplementary material. Data on DNA  
597 and cDNA sequencing will be made available on request.

## 598 **5.1 References**

599 AAFC, A.-F.C., 2021. Agricultural practices, Shelterbelt planning and establishment: Riparian buffers  
600 [WWW Document]. Agric. Environ. URL [https://www.agr.gc.ca/eng/agriculture-and-the-](https://www.agr.gc.ca/eng/agriculture-and-the-environment/agricultural-practices/agroforestry/shelterbelt-planning-and-establishment/design/riparian-buffers/?id=1344888191892)  
601 [environment/agricultural-practices/agroforestry/shelterbelt-planning-and-](https://www.agr.gc.ca/eng/agriculture-and-the-environment/agricultural-practices/agroforestry/shelterbelt-planning-and-establishment/design/riparian-buffers/?id=1344888191892)  
602 [establishment/design/riparian-buffers/?id=1344888191892](https://www.agr.gc.ca/eng/agriculture-and-the-environment/agricultural-practices/agroforestry/shelterbelt-planning-and-establishment/design/riparian-buffers/?id=1344888191892) (accessed 1.10.21).

603 Angel, R., Claus, P., Conrad, R., 2012. Methanogenic archaea are globally ubiquitous in aerated soils  
604 and become active under wet anoxic conditions. *ISME J.* 6, 847–862.  
605 <https://doi.org/10.1038/ismej.2011.141>

606 Audet, J., Elsgaard, L., Kjaergaard, C., Larsen, S.E., Hoffmann, C.C., 2013. Greenhouse gas emissions  
607 from a Danish riparian wetland before and after restoration. *Ecol. Eng.* 57, 170–182.  
608 <https://doi.org/10.1016/j.ecoleng.2013.04.021>

609 Bahram, M., Anslan, S., Hildebrand, F., Bork, P., Tedersoo, L., 2019. Newly designed 16S rRNA  
610 metabarcoding primers amplify diverse and novel archaeal taxa from the environment. *Environ.*  
611 *Microbiol. Rep.* 11, 487–494. <https://doi.org/10.1111/1758-2229.12684>

612 Baskerville, M., Reddy, N., Ofosu, E., Thevathasan, N. V., Oelbermann, M., 2021. Vegetation Type  
613 Does not Affect Nitrous Oxide Emissions from Riparian Zones in Agricultural Landscapes.  
614 *Environ. Manage.* <https://doi.org/10.1007/s00267-020-01419-w>

- 615 Bastian, M., Heymann, S., Jacomy, M., 2009. Gephi: An Open Source Software for Exploring and  
616 Manipulating Networks, in: International AAAI Conference on Weblogs and Social Media.  
617 <https://doi.org/10.13140/2.1.1341.1520>
- 618 Blazejewski, T., Ho, H.-I., Wang, H.H., 2019. Synthetic sequence entanglement augments stability  
619 and containment of genetic information in cells. *Science* 365, 595–598.  
620 <https://doi.org/10.1126/science.aav5477>
- 621 Bodelier, P. LE, 2011. Interactions between nitrogenous fertilizers and methane cycling in wetland and  
622 upland soils. *Curr. Opin. Environ. Sustain.* 3, 379–388.  
623 <https://doi.org/10.1016/j.cosust.2011.06.002>
- 624 Bokulich, N., Kaehler, B., Rideout, J., Dillon, M., Bolyen, E., Knight, R., Huttley, G., Caporaso, J.,  
625 2017. Optimizing taxonomic classification of marker gene sequences. *PeerJ Prepr.* 5:e3208v1.
- 626 Bolyen, E., Dillon, M., Bokulich, N., Abnet, C., Al-Ghalith, G., Alexander, H., Alm, E., Arumugam,  
627 M., Asnicar, F., Bai, Y., Bisanz, J., Bittinger, K., Brejnrod, A., Brislawn, C., Brown, T., Callahan,  
628 B., Chase, J., Cope, E., Dorrestein, P., Douglas, G., Durall, D., Duvallet, C., Edwardson, C.,  
629 Ernst, M., Estaki, M., Fouquier, J., Gauglitz, J., Gibson, D., Gonzalez, A., Gorlick, K., Guo, J.,  
630 Hillmann, B., Holmes, S., Holste, H., Huttenhower, C., Huttley, G., Janssen, S., Jarmusch, A.,  
631 Jiang, L., Kaehler, B., Keefe, C., Keim, P., Kelley, S., Knights, D., Koester, I., Kosciulek, T.,  
632 Kreps, J., Lee, J., Ley, R., Liu, Y.-X., Loftfield, E., Lozupone, C., Maher, M., Marotz, C., Martin,  
633 B., McDonald, D., McIver, L., Melnik, A., Metcalf, J., Morgan, S., Morton, J., Navas-Molina, J.,  
634 Orchanian, S., Pearson, T., Peoples, S., Petras, D., Pruesse, E., Rivers, A., Robeson, M.,  
635 Rosenthal, P., Segata, N., Shaffer, M., Shiffer, A., Sinha, R., Spear, J., Swafford, A., Thompson,  
636 L., Torres, P., Trinh, P., Tripathi, A., Turnbaugh, P., Ul-Hasan, S., Vargas, F., Vogtmann, E.,

- 637 Walters, W., Wan, Y., Wang, M., Warren, J., Weber, K., Willis, A., Zaneveld, J., Zhang, Y., Zhu,  
638 Q., Knight, R., Caporaso, G., 2019. QIIME 2: Reproducible, interactive, scalable, and extensible  
639 microbiome data science. *Nat. Biotechnol.* <https://doi.org/10.7287/peerj.preprints.27295>
- 640 Borden, K.A., Mafa-Attoye, T.G., Dunfield, K.E., Thevathasan, N. V., Gordon, A.M., Isaac, M.E.,  
641 2021. Root Functional Trait and Soil Microbial Coordination: Implications for Soil Respiration in  
642 Riparian Agroecosystems. *Front. Plant Sci.* 12. <https://doi.org/10.3389/fpls.2021.681113>
- 643 Bourgeois, B., Vanasse, A., Rivest, D., Poulin, M., 2016. Establishment success of trees planted in  
644 riparian buffer zones along an agricultural intensification gradient. *Agric. Ecosyst. Environ.* 222,  
645 60–66. <https://doi.org/10.1016/j.agee.2016.01.013>
- 646 Bradley, R.L., Whalen, J., Chagnon, P.L., Lanoix, M., Alves, M.C., 2011. Nitrous oxide production  
647 and potential denitrification in soils from riparian buffer strips: Influence of earthworms and plant  
648 litter. *Appl. Soil Ecol.* 47, 6–13. <https://doi.org/10.1016/j.apsoil.2010.11.007>
- 649 Cai, Y., Zheng, Y., Bodelier, P.L.E., Conrad, R., Jia, Z., 2016. Conventional methanotrophs are  
650 responsible for atmospheric methane oxidation in paddy soils. *Nat. Commun.* 7, 1–10.  
651 <https://doi.org/10.1038/ncomms11728>
- 652 Callahan, B.J., McMurdie, P.J., Rosen, M.J., Han, A.W., Johnson, A.J.A., Holmes, S.P., 2016.  
653 DADA2: High-resolution sample inference from Illumina amplicon data. *Nat. Methods* 13, 581–  
654 583. <https://doi.org/10.1038/nmeth.3869>
- 655 Capon, S.J., Chambers, L.E., Mac Nally, R., Naiman, R.J., Davies, P., Marshall, N., Pittock, J., Reid,  
656 M., Capon, T., Douglas, M., Catford, J., Baldwin, D.S., Stewardson, M., Roberts, J., Parsons, M.,  
657 Williams, S.E., 2013. Riparian Ecosystems in the 21st Century: Hotspots for Climate Change  
658 Adaptation? *Ecosystems* 16, 359–381. <https://doi.org/10.1007/s10021-013-9656-1>

- 659 De Carlo, N.D., Oelbermann, M., Gordon, A.M., 2019. Spatial and Temporal Variation in Soil Nitrous  
660 Oxide Emissions from a Rehabilitated and Undisturbed Riparian Forest. *J. Environ. Qual.* 48,  
661 624–633. <https://doi.org/10.2134/jeq2018.10.0357>
- 662 Deng, Y., Che, R., Wang, F., Conrad, R., Dumont, M., Yun, J., Wu, Y., Hu, A., Fang, J., Xu, Z., Cui,  
663 X., Wang, Y., 2019. Upland Soil Cluster Gamma dominates methanotrophic communities in  
664 upland grassland soils. *Sci. Total Environ.* 670, 826–836.  
665 <https://doi.org/10.1016/j.scitotenv.2019.03.299>
- 666 Dinsmore, K.J., Skiba, U.M., Billett, M.F., Rees, R.M., 2009a. Effect of water table on greenhouse gas  
667 emissions from peatland mesocosms. *Plant Soil* 318, 229–242. [https://doi.org/10.1007/s11104-](https://doi.org/10.1007/s11104-008-9832-9)  
668 008-9832-9
- 669 Dinsmore, K.J., Skiba, U.M., Billett, M.F., Rees, R.M., Drewer, J., 2009b. Spatial and temporal  
670 variability in CH<sub>4</sub> and N<sub>2</sub>O fluxes from a Scottish ombrotrophic peatland: Implications for  
671 modelling and up-scaling. *Soil Biol. Biochem.* 41, 1315–1323.  
672 <https://doi.org/10.1016/j.soilbio.2009.03.022>
- 673 Dunfield, P.F., Yimiga, M.T., Dedysh, S.N., Berger, U., Liesack, W., Heyer, J., 2002. Isolation of a  
674 *Methylocystis* strain containing a novel *pmoA*-like gene. *FEMS Microbiol. Ecol.* 41, 17–26.  
675 <https://doi.org/10.1111/j.1574-6941.2002.tb00962.x>
- 676 Dutaur, L., Verchot, L. V., 2007. A global inventory of the soil CH<sub>4</sub> sink. *Global Biogeochem.*  
677 *Cycles* 21, n/a-n/a. <https://doi.org/10.1029/2006GB002734>
- 678 Environment Canada, 2020. Canadian Climate Normals 1981-2010 Station Data. Ottawa.
- 679 Faust, K., Raes, J., 2016. CoNet app: inference of biological association networks using Cytoscape.



- 680 F1000Research 5, 1519. <https://doi.org/10.12688/f1000research.9050.2>
- 681 Feng, H., Guo, J., Han, M., Wang, W., Peng, C., Jin, J., Song, X., Yu, S., 2020. A review of the  
682 mechanisms and controlling factors of methane dynamics in forest ecosystems. *For. Ecol.*  
683 *Manage.* 455, 117702. <https://doi.org/10.1016/j.foreco.2019.117702>
- 684 Fernandes, S.A.P., Bernoux, M., Cerri, C.C., Feigl, B.J., Piccolo, M.C., 2002. Seasonal variation of  
685 soil chemical properties and CO<sub>2</sub> and CH<sub>4</sub> fluxes in unfertilized and P-fertilized pastures in an  
686 Ultisol of the Brazilian Amazon. *Geoderma* 107, 227–241.
- 687 Fortier, J., Gagnon, D., Truax, B., Lambert, F., 2010. Nutrient accumulation and carbon sequestration  
688 in 6-year-old hybrid poplars in multiclonal agricultural riparian buffer strips. *Agric. Ecosyst.*  
689 *Environ.* 137, 276–287. <https://doi.org/10.1016/j.agee.2010.02.013>
- 690 Guidotti, V., Ferraz, S.F. de B., Pinto, L.F.G., Sparovek, G., Taniwaki, R.H., Garcia, L.G., Brancalion,  
691 P.H.S., 2020. Changes in Brazil's Forest Code can erode the potential of riparian buffers to  
692 supply watershed services. *Land use policy* 94, 104511.  
693 <https://doi.org/10.1016/j.landusepol.2020.104511>
- 694 Holmes, A.J., Costello, A., Lidstrom, M.E., Murrell, J.C., 1995. Evidence that particulate methane  
695 monooxygenase and ammonia monooxygenase may be evolutionarily related. *FEMS Microbiol.*  
696 *Lett.* 132, 203–208. [https://doi.org/10.1016/0378-1097\(95\)00311-R](https://doi.org/10.1016/0378-1097(95)00311-R)
- 697 Hutchinson, G.L., Mosier, A.R., 1981. Improved Soil Cover Method for Field Measurement of Nitrous  
698 Oxide Fluxes. *Soil Sci. Soc. Am. J.* 45, 311–316.  
699 <https://doi.org/10.2136/sssaj1981.03615995004500020017x>
- 700 Jacinthe, P.A., Vidon, P., Fisher, K., Liu, X., Baker, M.E., 2015. Soil Methane and Carbon Dioxide

- 701 Fluxes from Cropland and Riparian Buffers in Different Hydrogeomorphic Settings. *J. Environ.*  
702 *Qual.* 44, 1080–1090. <https://doi.org/10.2134/jeq2015.01.0014>
- 703 Kaiser, K.E., McGlynn, B.L., Dore, J.E., 2018. Landscape analysis of soil methane flux across  
704 complex terrain. *Biogeosciences* 15, 3143–3167. <https://doi.org/10.5194/bg-15-3143-2018>
- 705 Katoh, K., 2002. MAFFT: a novel method for rapid multiple sequence alignment based on fast Fourier  
706 transform. *Nucleic Acids Res.* 30, 3059–3066. <https://doi.org/10.1093/nar/gkf436>
- 707 Kim, D., Isenhardt, T.M., Parkin, T.B., Schultz, R.C., Loynachan, T.E., 2010a. Methane Flux in  
708 Cropland and Adjacent Riparian Buffers with Different Vegetation Covers. *J. Environ. Qual.* 39,  
709 97–105. <https://doi.org/10.2134/jeq2008.0408>
- 710 Kim, D., Isenhardt, T.M., Parkin, T.B., Schultz, R.C., Loynachan, T.E., 2010b. Methane Flux in  
711 Cropland and Adjacent Riparian Buffers with Different Vegetation Covers. *J. Environ. Qual.* 39,  
712 97–105. <https://doi.org/10.2134/jeq2008.0408>
- 713 Kim, S.Y., Lee, S.H., Freeman, C., Fenner, N., Kang, H., 2008. Comparative analysis of soil microbial  
714 communities and their responses to the short-term drought in bog, fen, and riparian wetlands. *Soil*  
715 *Biol. Biochem.* 40, 2874–2880. <https://doi.org/10.1016/j.soilbio.2008.08.004>
- 716 Knief, C., 2015. Diversity and habitat preferences of cultivated and uncultivated aerobic  
717 methanotrophic bacteria evaluated based on *pmoA* as molecular marker. *Front. Microbiol.* 6.  
718 <https://doi.org/10.3389/fmicb.2015.01346>
- 719 Kolb, S., 2009. The quest for atmospheric methane oxidizers in forest soils. *Environ. Microbiol. Rep.*  
720 1, 336–346. <https://doi.org/10.1111/j.1758-2229.2009.00047.x>
- 721 Kou, Y., Wei, K., Li, C., Wang, Y., Tu, B., Wang, J., Li, X., Yao, M., 2020. Deterministic processes

- 722       dominate soil methanotrophic community assembly in grassland soils. *Geoderma* 359.
- 723       <https://doi.org/10.1016/j.geoderma.2019.114004>
- 724       Krause, S., Meima-Franke, M., Hefting, M.M., Bodelier, P.L.E., 2013. Spatial patterns of
- 725       methanotrophic communities along a hydrological gradient in a riparian wetland. *FEMS*
- 726       *Microbiol. Ecol.* 86, 59–70. <https://doi.org/10.1111/1574-6941.12091>
- 727       Letunic, I., Bork, P., 2016. Interactive tree of life (iTOL) v3: an online tool for the display and
- 728       annotation of phylogenetic and other trees. *Nucleic Acids Res.*
- 729       <https://doi.org/10.1093/nar/gkw290>
- 730       Lima, A.B., Muniz, A.W., Dumont, M.G., 2014. Activity and abundance of methane-oxidizing
- 731       bacteria in secondary forest and manioc plantations of Amazonian Dark Earth and their adjacent
- 732       soils. *Front. Microbiol.* 5, 1–10. <https://doi.org/10.3389/fmicb.2014.00550>
- 733       Lovell, S.T., Sullivan, W.C., 2006. Environmental benefits of conservation buffers in the United
- 734       States: Evidence, promise, and open questions. *Agric. Ecosyst. Environ.* 112, 249–260.
- 735       <https://doi.org/10.1016/j.agee.2005.08.002>
- 736       Mafa-Attoye, T.G., Baskerville, M.A., Ofosu, E., Oelbermann, M., Thevathasan, N. V., Dunfield,
- 737       K.E., 2020. Riparian land-use systems impact soil microbial communities and nitrous oxide
- 738       emissions in an agro-ecosystem. *Sci. Total Environ.* 724.
- 739       <https://doi.org/10.1016/j.scitotenv.2020.138148>
- 740       Malyan, S.K., Bhatia, A., Kumar, A., Kumar, D., Singh, R., Kumar, S.S., Tomer, R., Kumar, O., Jain,
- 741       N., 2016. Methane production , oxidation and mitigation: A mechanistic understanding and
- 742       comprehensive evaluation of in fluencing factors. *Sci. Total Environ.* 572, 874–896.
- 743       <https://doi.org/10.1016/j.scitotenv.2016.07.182>

- 744 Mander, Ü., Maddison, M., Soosaar, K., Teemusk, A., Kanal, A., Uri, V., Truu, J., 2015. The impact  
745 of a pulsing groundwater table on greenhouse gas emissions in riparian grey alder stands.  
746 *Environ. Sci. Pollut. Res.* 22, 2360–2371. <https://doi.org/10.1007/s11356-014-3427-1>
- 747 Matson, A.L., Corre, M.D., Langs, K., Veldkamp, E., 2017. Soil trace gas fluxes along orthogonal  
748 precipitation and soil fertility gradients in tropical lowland forests of Panama. *Biogeosciences* 14,  
749 3509–3524.
- 750 Meneses, B.M., Reis, R., Vale, M.J., Saraiva, R., 2015. Land use and land cover changes in Zêzere  
751 watershed (Portugal) - Water quality implications. *Sci. Total Environ.* 527–528, 439–447.  
752 <https://doi.org/10.1016/j.scitotenv.2015.04.092>
- 753 Mozuraitis, E., Hagarty, J., 1996. Upgrade of soil survey information for Oxford County. London.
- 754 Nazaries, L., Murrell, J.C., Millard, P., Baggs, L., Singh, B.K., 2013. Methane, microbes and models:  
755 Fundamental understanding of the soil methane cycle for future predictions. *Environ. Microbiol.*  
756 15, 2395–2417. <https://doi.org/10.1111/1462-2920.12149>
- 757 NRCS, U.S.N.R.C.S., 2011. Natural Conservation Practice Standard: Riparian forest buffer. USA.
- 758 Nyerges, G., Han, S.-K., Stein, L.Y., 2010. Effects of Ammonium and Nitrite on Growth and  
759 Competitive Fitness of Cultivated Methanotrophic Bacteria. *Appl. Environ. Microbiol.* 76, 5648–  
760 5651. <https://doi.org/10.1128/AEM.00747-10>
- 761 O’Connell, C.S., Ruan, L., Silver, W.L., 2018. Drought drives rapid shifts in tropical rainforest soil  
762 biogeochemistry and greenhouse gas emissions. *Nat. Commun.* 9, 1348.  
763 <https://doi.org/10.1038/s41467-018-03352-3>
- 764 Oelbermann, M., Gordon, A.M., 2000. Quantity and quality of autumnal litterfall into a rehabilitated

- 765 agricultural stream. *Ecosyst. Restor.* 611, 603–611.
- 766 Oelbermann, M., Gordon, A.M., Kaushik, N.K., 2008. Biophysical Changes Resulting from 16 Years  
767 of Riparian Forest Rehabilitation: An Example from the Southern Ontario Agricultural  
768 Landscape, in: Jose, S., Gordon, A.M. (Eds.), *Toward Agroforestry Design: An Ecological  
769 Approach*. Springer Netherlands, Dordrecht, pp. 13–26. [https://doi.org/10.1007/978-1-4020-  
770 6572-9\\_2](https://doi.org/10.1007/978-1-4020-6572-9_2)
- 771 Oelbermann, M., Raimbault, B.A., 2014. Riparian Land-Use and Rehabilitation: Impact on Organic  
772 Matter Input and Soil Respiration. *Environ. Manage.* 55, 496–507.  
773 <https://doi.org/10.1007/s00267-014-0410-z>
- 774 Price, M.N., Dehal, P.S., Arkin, A.P., 2010. FastTree 2 – Approximately Maximum-Likelihood Trees  
775 for Large Alignments. *PLoS One* 5, e9490. <https://doi.org/10.1371/journal.pone.0009490>
- 776 Quast, C., Pruesse, E., Yilmaz, P., Gerken, J., Schweer, T., Yarza, P., Peplies, J., Glöckner, F.O.,  
777 2012. The SILVA ribosomal RNA gene database project: improved data processing and web-  
778 based tools. *Nucleic Acids Res.* 41, D590–D596. <https://doi.org/10.1093/nar/gks1219>
- 779 Serrano-Silva, N., Sarria-Guzmán, Y., Dendooven, L., Luna-Guido, M., 2014. Methanogenesis and  
780 Methanotrophy in Soil: A Review. *Pedosphere* 24, 291–307. [https://doi.org/10.1016/S1002-  
781 0160\(14\)60016-3](https://doi.org/10.1016/S1002-0160(14)60016-3)
- 782 Shannon, P., 2003. Cytoscape: A Software Environment for Integrated Models of Biomolecular  
783 Interaction Networks. *Genome Res.* 13, 2498–2504. <https://doi.org/10.1101/gr.1239303>
- 784 Sonesson, J., Ring, E., Högbom, L., Lämås, T., Widenfalk, O., Mohtashami, S., Holmström, H., 2020.  
785 Costs and benefits of seven alternatives for riparian forest buffer management. *Scand. J. For. Res.*

- 786 0, 1–9. <https://doi.org/10.1080/02827581.2020.1858955>
- 787 Szafranek-Nakonieczna, A., Wolińska, A., Zielenkiewicz, U., Kowalczyk, A., Stepniewska, Z.,  
788 Błaszczuk, M., 2019. Activity and Identification of Methanotrophic Bacteria in Arable and No-  
789 Tillage Soils from Lublin Region (Poland). *Microb. Ecol.* 77, 701–712.  
790 <https://doi.org/10.1007/s00248-018-1248-3>
- 791 Tate, K.R., 2015. Soil methane oxidation and land-use change - from process to mitigation. *Soil Biol.*  
792 *Biochem.* 80, 260–272. <https://doi.org/10.1016/j.soilbio.2014.10.010>
- 793 Verchot, L. V., Davidson, E.A., Cattânio, J.H., Ackerman, I.L., 2000. Land-use change and  
794 biogeochemical controls of methane fluxes in soils of eastern Amazonia. *Ecosystems* 3, 41–56.  
795 <https://doi.org/10.1007/s100210000009>
- 796 Vidon, P., Jacinthe, P.A., Liu, X., Fisher, K., Baker, M., 2014. Hydrobiogeochemical controls on  
797 riparian nutrient and greenhouse gas dynamics: 10 years post-restoration. *J. Am. Water Resour.*  
798 *Assoc.* 50, 639–652. <https://doi.org/10.1111/jawr.12201>
- 799 Vidon, P., Marchese, S., Welsh, M., McMillan, S., 2016. Impact of Precipitation Intensity and  
800 Riparian Geomorphic Characteristics on Greenhouse Gas Emissions at the Soil-Atmosphere  
801 Interface in a Water-Limited Riparian Zone. *Water, Air, Soil Pollut.* 227, 8.  
802 <https://doi.org/10.1007/s11270-015-2717-7>
- 803 Vidon, P., Marchese, S., Welsh, M., McMillan, S., 2015. Short-term spatial and temporal variability in  
804 greenhouse gas fluxes in riparian zones. *Environ. Monit. Assess.* 187.  
805 <https://doi.org/10.1007/s10661-015-4717-x>
- 806 Vidon, P.G., Welsh, M.K., Hassanzadeh, Y.T., 2019. Twenty Years of Riparian Zone Research (1997-



- 807           2017): Where to Next? *J. Environ. Qual.* 48, 248–260. <https://doi.org/10.2134/jeq2018.01.0009>
- 808   Yang, S., Wen, X., Liebner, S., 2016. pmoA gene reference database (fasta-formatted sequences and  
809           taxonomy). *GFZ Data Serv.* <https://doi.org/10.5880/GFZ.5.3.2016.001>
- 810   Ye, Y., He, X.Y., Chen, W., Yao, J., Yu, S., Jia, L., 2014. Seasonal water quality upstream of  
811           Dahuofang Reservoir, China - the effects of land use type at various spatial scales. *Clean - Soil,*  
812           *Air, Water* 42, 1423–1432. <https://doi.org/10.1002/clen.201300600>
- 813   Zeng, L., Tian, J., Chen, H., Wu, N., Yan, Z., Du, L., Shen, Y., Wang, X., 2019. Changes in methane  
814           oxidation ability and methanotrophic community composition across different climatic zones. *J.*  
815           *Soils Sediments* 19, 533–543. <https://doi.org/10.1007/s11368-018-2069-1>
- 816

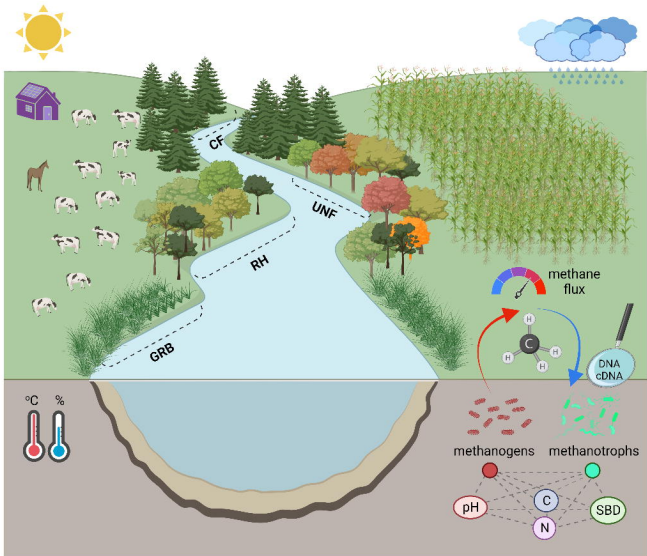

Source: https://www.biorxiv.org/content/10.1101/2022.11.24.517857v1.full.pdf
